# Supplementary material for: Zinc-Dependent Oligomerization of Thermus thermophilus Trigger Factor Chaperone
Source: MDPI journal article supplement (doi:10.3390/biology10111106), 2021-10-26
Supplement: s1 [file s1]

Supplementary Materials for

Zinc-dependent oligomerization of *Thermus thermophilus* trigger factor

Haojie Zhu, Motonori Matsusaki, Taiga Sugawara, Koichiro Ishimori\*, and Tomohide Saio\*

\* Correspondence: [saio@tokushima-u.ac.jp](mailto:saio@tokushima-u.ac.jp); Tel. +81-88-634-6412

[koichiro@sci.hokudai.ac.jp](mailto:koichiro@sci.hokudai.ac.jp); Tel. +81-11-706-2707

**This PDF file includes:**

Table S1

Figs. S1 to S4

**Table S1.** The primers and templates for plasmid construction.

| Primer | Oligo sequence (5' to 3')               | PCR template                                                  | Constructed plasmid                                           |
|--------|-----------------------------------------|---------------------------------------------------------------|---------------------------------------------------------------|
| 1      | CATCACGTGGCGGAGATCCTG                   | <i>Tt</i> TF gene                                             | <i>His</i> <sub>6</sub> - <i>Tt</i> TF                        |
| 2      | GAACAGAACTTCCAGTCAGCCCAGGG              | segment                                                       |                                                               |
| 3      | CCGCCACGTGATGATGATGAT                   | pCold                                                         |                                                               |
| 4      | TGACTGGAAGTTCTGTTC                      | <i>Ec</i> TF <sup>RBD</sup> vector                            |                                                               |
| 5      | CATCATCACATGGAAGTTAAAGAACTTG            | <i>Tm</i> TF gene                                             | <i>His</i> <sub>6</sub> - <i>Tm</i> TF                        |
| 6      | CCGCGGATTAGTTGTCCTCCTTCCC               | segment                                                       |                                                               |
| 7      | GACAACTAATCCGCGGGTCTGGAA                | pCold                                                         |                                                               |
| 8      | AACTTCCATGTGATGATGATGATGATG             | <i>Ec</i> TF <sup>RBD</sup> vector                            |                                                               |
| 9      | GAAAACCTGTATTTTCAGGGTGTGGCGGAGATCCTGGAG | <i>His</i> <sub>6</sub> - <i>Tt</i> TF                        | <i>His</i> <sub>6</sub> -TEV- <i>Tt</i> TF                    |
| 10     | ACCCTGAAAATAAGGTTTTCTGTGATGATGATGATG    |                                                               |                                                               |
| 11     | GAAAACCTGTATTTTCAGATGCAAGTTTCAGTTGA     | <i>His</i> <sub>6</sub> - <i>Ec</i> TF                        | <i>His</i> <sub>6</sub> -TEV- <i>Ec</i> TF                    |
| 12     | CTGAAAATACAGGTTTTCTGTGATGATGATGATGATG   |                                                               |                                                               |
| 13     | CCCCGAGTGACTGGAAGTTCTGTTC               | <i>His</i> <sub>6</sub> -TEV- <i>Tt</i> TF                    | <i>His</i> <sub>6</sub> -TEV- <i>Tt</i> TF <sup>RBD</sup>     |
| 14     | TCCAGTCACTCGGGGTAGTTCTCCAC              |                                                               |                                                               |
| 15     | TCAGGGTCCCGAGGTGAGGCTTCCC               | <i>His</i> <sub>6</sub> -TEV- <i>Tt</i> TF                    | <i>His</i> <sub>6</sub> -TEV- <i>Tt</i> TF <sup>PPD-SBD</sup> |
| 16     | ACCTCGGGACCCTGAAAATACAGGTT              |                                                               |                                                               |
| 17     | CTACGCCGAGCTGGACGAGGAGTTC               | <i>His</i> <sub>6</sub> -TEV- <i>Tt</i> TF <sup>PPD-SBD</sup> | <i>His</i> <sub>6</sub> -TEV- <i>Tt</i> TF <sup>SBD</sup>     |
| 18     | TCCAGCTCGGCGTAGCGCTGGCGGAG              |                                                               |                                                               |
| 19     | GGTAGTGGCAGCGGAGAGCTGGACGAGGAGTTC       | <i>His</i> <sub>6</sub> -TEV- <i>Tt</i> TF <sup>SBD</sup>     | <i>His</i> <sub>6</sub> -TEV- <i>Tt</i> TF <sup>SBD</sup>     |
| 20     | TCCGCTGCCACTACCGGCGTAGCGCTGGCGGAG       |                                                               | (GSGSG)                                                       |
| 21     | TCAGGGTGCCGAGCTCGTCCCCGTG               | <i>His</i> <sub>6</sub> -TEV- <i>Tt</i> TF                    | <i>His</i> <sub>6</sub> -TEV- <i>Tt</i> TF <sup>PPD</sup>     |
| 22     | AGCTCGGCACCCTGAAAATACAGGTT              |                                                               | (step 1)                                                      |
| 23     | CCCCGAGTGACTGGAAGTTCTGTTC               | <i>His</i> <sub>6</sub> -TEV- <i>Tt</i> TF <sup>PPD</sup>     | <i>His</i> <sub>6</sub> -TEV- <i>Tt</i> TF <sup>PPD</sup>     |
| 24     | TCCAGTCACTCGGGGAGCTTCAGGGT              | (step 1)                                                      |                                                               |
| 17     | CTACGCCGAGCTGGACGAGGAGTTC               | <i>His</i> <sub>6</sub> -TEV- <i>Tt</i> TF                    | <i>His</i> <sub>6</sub> -TEV- <i>Tt</i> TF <sup>RBD-SBD</sup> |
| 18     | TCCAGCTCGGCGTAGCGCTGGCGGAG              |                                                               |                                                               |
| 19     | GGTAGTGGCAGCGGAGAGCTGGACGAGGAGTTC       | <i>His</i> <sub>6</sub> -TEV- <i>Tt</i> TF <sup>RBD-SBD</sup> | <i>His</i> <sub>6</sub> -TEV- <i>Tt</i> TF <sup>RBD-SBD</sup> |
| 20     | TCCGCTGCCACTACCGGCGTAGCGCTGGCGGAG       |                                                               | (GSGSG)                                                       |

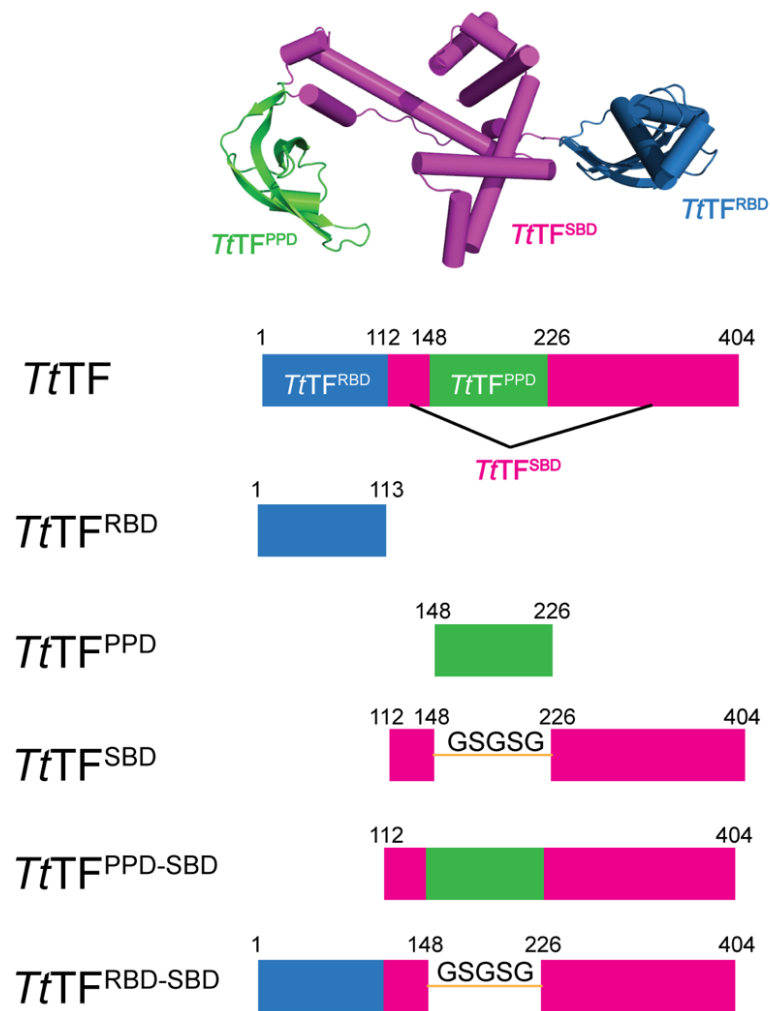

**Figure S1. The domain architecture of *TtTF*.** The domain architecture of *TtTF* and the constructs used in MALDI-TOF-MS experiments are shown with predicted structure of *TtTF*. The coordinate of *TtTF* was calculated by AlphaFold2 (<https://colab.research.google.com/drive/1LVPSOf4L502F21RWBmYJJYYLDIOU2NTL>, Accessed date: 17 August 2021).

*EcTF* MQV.SVE TTQGLGRRVTITIAADSIETAVKSELVNVAKKVRIDGFRKGKVP MNIVAQRYG  
*TtTF* MAE.ILEERS.GYLVKVRVEVPADRVKASYEAL LKDLASRVRVPGFRPGKAPLKVV EARLG  
*TmTF* MEVKELEERD.KNRVVLEYVFGAEETIAQAEDKAVRYLNQ RVEIPGFRKGRI PKNV LKMLKG

*EcTF* AS.VRQDVLGDLMSRNFIDAI..IKEKINPAGAPTYVPG EYKLGEDFTYSVEFEVYPEVE  
*TtTF* REALLQDLKERLVEETYP EAV..RELGLSPVAAR.VVEQDLSEGEGRFYVAEVENYPEVVR  
*TmTF* EE.FQEYTLDFLMDLIPDTLKDRKLI LSPI....VTERELKDVT.ARVVVEVHEEPEVVR

*EcTF* LQGLEAIEVEKPI.VEVT DADVDGMLDTLRKQQA TWKEKDGAVEAEDRVTIDFT.GSV DGG  
*TtTF* LPDWRSFALVESP.PEVTEEMVEKALEELRQRYAELVPV EREAQEKDHLFVR....TEEG  
*TmTF* IGDISKIEVEKVDEEKVLEKYVERRIEDLRESHALLEPKEGPAEAGDLVRVNMEVYN EEG

*EcTF* EEFEGGKASDFVLA MGQGRMI PGFEDG IKGHKAG EEF TIDVTFPEEYHAENLKGK.AAKF  
*TtTF* .....AEF..PIDLAKALPHVR EALLGKKAGDVVMVPVL.....NDKGEKVREV  
*TmTF* KKLT.SREY EY..VISEDEDRPFVKD.LVGKKKG DVVEI ERE.....YEGK.KYTY

*EcTF* AINLKKVEERE LPELTAEFIKRFGVEDGSVEGLRAEVRKNMERELKSAIRNRVKSQAIEG  
*TtTF* RTEVLEVKTLKLPELDEEF AKTL..EAE SLEDLKNRVR ESKRQAERAYEEARERAFLEK  
*TmTF* KLEVEEVYKRTLPEIGDELAKSVNN EFE TLEQLKES LKKEGKEIYDVEMKESMREQLEK

*EcTF* LVKAN DIDVPAALIDSEIDVLR.....RQAA....QRFGGNEKQAL ELPRELFE EQA  
*TtTF* LAEGL EVEIPPSMLRAEERHLL EHLAEDLYRQGISLEAYLEALKEKGEL EKFQEDLRKEA  
*TmTF* LPEIV EIEI SDRTL EILVNEI....NRLK REGR....YEQIVSSYSE EKFRELKERI

*EcTF* KRRVVVGLLLGEVIRTNELKAD EERVKGLIEEMASAYEDPK.EVIEFY SKNKELMDNMNRN  
*TtTF* EKRVRIALAREKLAEELNPEVSEEEWQAYLQAAARAYGVAV.....QDLRRQFGE  
*TmTF* LDDIKRDRVIEVLAQEKGISVND EEELEKEAEELAPFWGISPDRAKSLVKARQDLREELRW

*EcTF* VAL EEQAVEAVLAKAKVTEK.ETTFNELMNQQA....  
*TtTF* EGLAR.LKERLRQDKAVQEALKALG.....  
*TmTF* AILKRKVLDLL LQEVKV KVV.EPKG.EGDDSEGKEDN

**Figure S2. Amino acid sequence alignment of *EcTF*, *TtTF*, and *TmTF*.** The conserved amino acid residues are shown in blue frame and the identical residues are highlighted in red background. The identity and similarity between *EcTF* and *TtTF* are 26% and 49%, respectively. The identity and similarity between *TtTF* and *TmTF* are 35% and 52%, respectively. The identity and similarity between *EcTF* and *TmTF* are 24% and 45%, respectively. The sequence alignment was performed operated on the BLAST web server (<https://blast.ncbi.nlm.nih.gov/Blast.cgi>, Accessed date:14 April 2021, and 9 October 2021).

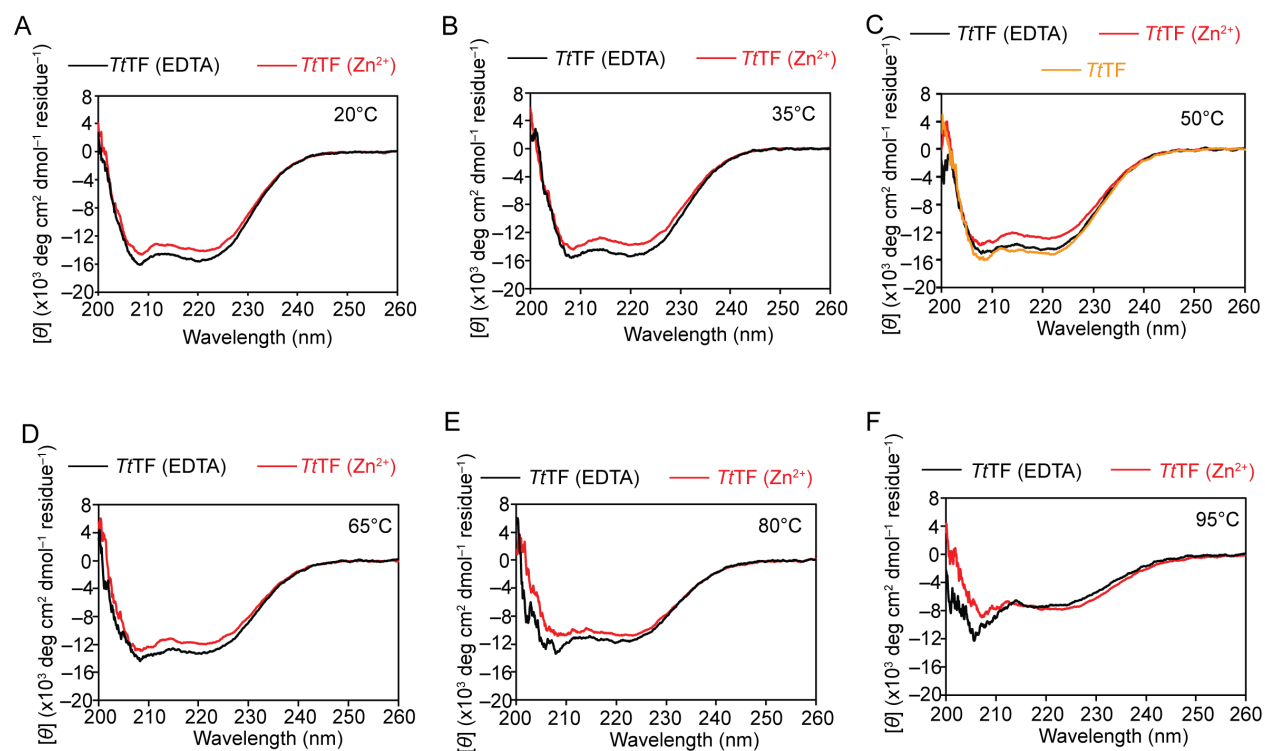

**Figure S3. The CD spectra of *TtTF* at varying temperatures.** The CD spectra of *TtTF* ( $\text{Zn}^{2+}$ ) (red) and *TtTF* (EDTA) (black) at 20°C (A), 35°C (B), 65°C (C), 80°C (D), and 95°C (E) from 200 nm to 260 nm are displayed. The CD spectrum of *TtTF* before refolding at 50°C (orange) (C) is superimposed, showing that the spectrum of *TtTF* before refolding is essentially the same as that of *TtTF* (EDTA).

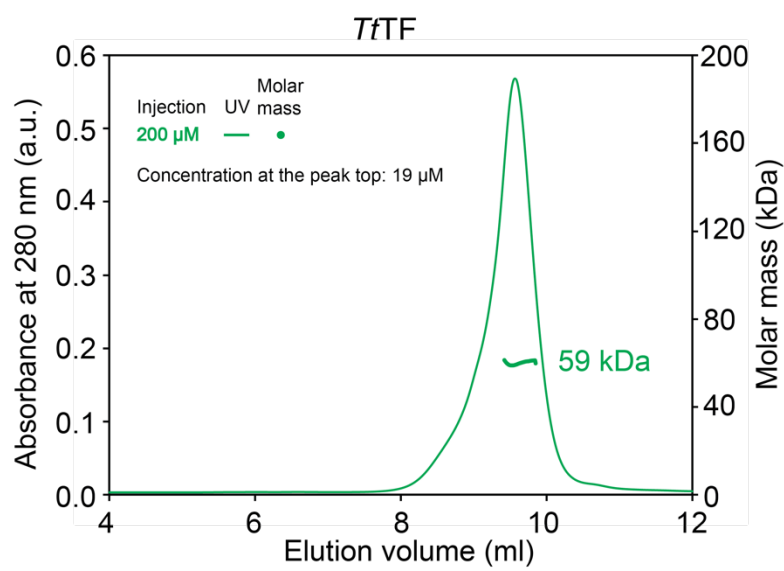

**Figure S4. SEC-MALS profile of the natively purified *Tt*TF before refolding.** The mass plots show that *Tt*TF exists mostly as a monomer at  $\sim 19 \mu\text{M}$ , which coincides with the SEC-MALS data of *Tt*TF (EDTA).
